# Supplementary material
Source: MDPI journal article supplement (https://www.mdpi.com/2073-445X/13/1/83)
Supplement: s1 [file s1]

## Supplementary Materials

Table S1 - Species list of spiders and related traits based on literature data (1/4)

| Species                        | Body length of females (mm) | Ballooning |
|--------------------------------|-----------------------------|------------|
|                                | [1–4]                       | [5,6]      |
| <i>Agroeca brunnea</i>         | 8.0                         | no         |
| <i>Agroeca inopina</i>         | 7.5                         | no         |
| <i>Agyneta affinis</i>         | 2.0                         | no         |
| <i>Agyneta decora</i>          | 2.5                         | no         |
| <i>Agyneta mollis</i>          | 2.0                         | yes        |
| <i>Agyneta rurestris</i>       | 2.4                         | yes        |
| <i>Alopecosa cuneata</i>       | 8.0                         | no         |
| <i>Alopecosa pulverulenta</i>  | 10.0                        | yes        |
| <i>Antistea elegans</i>        | 3.0                         | no         |
| <i>Argenna subnigra</i>        | 2.5                         | no         |
| <i>Asagena phalerata</i>       | 5.0                         | no         |
| <i>Atypus affinis</i>          | 15.0                        | yes        |
| <i>Aulonia albimana</i>        | 4.5                         | yes        |
| <i>Bathypantes gracilis</i>    | 2.5                         | yes        |
| <i>Centromerita bicolor</i>    | 3.5                         | yes        |
| <i>Centromerus sylvaticus</i>  | 4.0                         | yes        |
| <i>Ceratinella brevis</i>      | 1.5                         | no         |
| <i>Cicurina cicur</i>          | 7.0                         | no         |
| <i>Civizelotes civicus</i>     | 4.3                         | no         |
| <i>Clubiona diversa</i>        | 5.0                         | no         |
| <i>Clubiona neglecta</i>       | 8.0                         | no         |
| <i>Clubiona terrestris</i>     | 7.0                         | no         |
| <i>Cnephalocotes obscurus</i>  | 1.9                         | yes        |
| <i>Collinsia inerrans</i>      | 2.5                         | yes        |
| <i>Cryptachaea blattae</i>     | 3.2                         | yes        |
| <i>Dicymbium nigrum</i>        | 2.5                         | yes        |
| <i>Dicymbium tibiale</i>       | 2.6                         | no         |
| <i>Diplocephalus latifrons</i> | 2.0                         | no         |
| <i>Diplocephalus picinus</i>   | 1.0                         | no         |
| <i>Diplostyla concolor</i>     | 3.0                         | yes        |
| <i>Drassodes cf. lapidosus</i> | 18.0                        | no         |
| <i>Drassodes pubescens</i>     | 9.0                         | no         |
| <i>Drassyllus lutetianus</i>   | 7.5                         | yes        |
| <i>Drassyllus praeficus</i>    | 6.0                         | yes        |
| <i>Drassyllus pusillus</i>     | 5.0                         | yes        |
| <i>Drassyllus villicus</i>     | 6.9                         | yes        |
| <i>Dysdera crocata</i>         | 15.0                        | no         |
| <i>Dysdera erythrina</i>       | 10.0                        | no         |
| <i>Enoplognatha latimana</i>   | 6.0                         | no         |
| <i>Enoplognatha mordax</i>     | 8.5                         | yes        |

Table S1 – Species list of spiders and related traits based on literature data (2/4)

| Species                         | Body length of females (mm) | Ballooning |
|---------------------------------|-----------------------------|------------|
|                                 | [1–4]                       | [5,6]      |
| <i>Enoplognatha testacea</i>    | 3.2                         | no         |
| <i>Enoplognatha thoracica</i>   | 4.0                         | no         |
| <i>Episinus truncatus</i>       | 4.0                         | no         |
| <i>Eratigena picta</i>          | 7.0                         | no         |
| <i>Erigone atra</i>             | 2.8                         | yes        |
| <i>Erigone dentipalpis</i>      | 2.6                         | yes        |
| <i>Ero furcata</i>              | 3.2                         | yes        |
| <i>Ero tuberculata</i>          | 4.0                         | no         |
| <i>Euophrys frontalis</i>       | 5.0                         | no         |
| <i>Gnathonarium dentatum</i>    | 3.0                         | yes        |
| <i>Gongylidiellum vivum</i>     | 1.9                         | yes        |
| <i>Hahnia nava</i>              | 2.0                         | no         |
| <i>Haplodrassus dalmatensis</i> | 6.5                         | no         |
| <i>Haplodrassus signifer</i>    | 9.0                         | no         |
| <i>Hypomma cornutum</i>         | 2.9                         | yes        |
| <i>Lasaeola prona</i>           | 2.5                         | no         |
| <i>Lathys humilis</i>           | 2.5                         | yes        |
| <i>Maso sundevalli</i>          | 1.8                         | no         |
| <i>Mermessus trilobatus</i>     | 2.1                         | no         |
| <i>Micaria albovittata</i>      | 8.0                         | no         |
| <i>Micaria micans</i>           | 4.1                         | yes        |
| <i>Micrargus herbigradus</i>    | 1.9                         | yes        |
| <i>Micrargus subaequalis</i>    | 2.0                         | yes        |
| <i>Microneta viaria</i>         | 3.0                         | yes        |
| <i>Monocephalus fuscipes</i>    | 2.2                         | yes        |
| <i>Neottiura bimaculata</i>     | 3.3                         | yes        |
| <i>Neottiura suaveolens</i>     | 2.3                         | no         |
| <i>Nerienne clathrata</i>       | 5.0                         | no         |
| <i>Oedothorax apicatus</i>      | 3.3                         | yes        |
| <i>Oedothorax fuscus</i>        | 2.9                         | yes        |
| <i>Oedothorax retusus</i>       | 3.0                         | yes        |
| <i>Ostearius melanopygius</i>   | 2.6                         | no         |
| <i>Ozyptila brevipes</i>        | 4.0                         | no         |
| <i>Ozyptila praticola</i>       | 4.0                         | no         |
| <i>Ozyptila sanctuaria</i>      | 4.0                         | yes        |
| <i>Ozyptila simplex</i>         | 5.0                         | yes        |
| <i>Pachygnatha clercki</i>      | 7.0                         | yes        |
| <i>Pachygnatha degeeri</i>      | 3.7                         | yes        |
| <i>Palliduphantes ericaeus</i>  | 1.9                         | yes        |
| <i>Palliduphantes insignis</i>  | 2.5                         | no         |
| <i>Palliduphantes pallidus</i>  | 2.3                         | no         |
| <i>Panamomops sulcifrons</i>    | 1.5                         | no         |

Table S1 - Species list of spiders and related traits based on literature (3/4)

| Species                        | Body length of females (mm) | Ballooning |
|--------------------------------|-----------------------------|------------|
|                                | [1–4]                       | [5,6]      |
| <i>Pardosa amentata</i>        | 8.0                         | yes        |
| <i>Pardosa cf. tenuipes</i>    | 6.5                         | yes        |
| <i>Pardosa hortensis</i>       | 5.5                         | no         |
| <i>Pardosa nigriceps</i>       | 7.0                         | yes        |
| <i>Pardosa palustris</i>       | 6.0                         | yes        |
| <i>Pardosa prativaga</i>       | 6.0                         | yes        |
| <i>Pardosa pullata</i>         | 6.0                         | yes        |
| <i>Pardosa saltans</i>         | 5.7                         | no         |
| <i>Pardosa vittata</i>         | 6.3                         | no         |
| <i>Pelecopsis parallela</i>    | 2.0                         | yes        |
| <i>Philodromus praedatus</i>   | 6.0                         | yes        |
| <i>Phlegra fasciata</i>        | 7.0                         | yes        |
| <i>Phrurolithus festivus</i>   | 3.0                         | no         |
| <i>Phrurolithus minimus</i>    | 3.5                         | no         |
| <i>Phycosoma inornatum</i>     | 3.0                         | no         |
| <i>Piratula latitans</i>       | 5.0                         | no         |
| <i>Pisaura mirabilis</i>       | 15.0                        | yes        |
| <i>Pocadicnemis juncea</i>     | 2.2                         | no         |
| <i>Porrhomma pygmaeum</i>      | 2.4                         | yes        |
| <i>Prinerigone vagans</i>      | 3.2                         | yes        |
| <i>Psilochorus simoni</i>      | 2.5                         | no         |
| <i>Robertus arundineti</i>     | 2.5                         | yes        |
| <i>Robertus lividus</i>        | 4.0                         | no         |
| <i>Saaristoa abnormis</i>      | 4.0                         | no         |
| <i>Scotina palliardii</i>      | 3.5                         | no         |
| <i>Stemonyphantes lineatus</i> | 6.4                         | no         |
| <i>Styloctetor compar</i>      | 2.3                         | no         |
| <i>Synageles venator</i>       | 4.0                         | no         |
| <i>Tallusia experta</i>        | 3.6                         | yes        |
| <i>Tapinocyba praecox</i>      | 1.8                         | yes        |
| <i>Tenuiphantes flavipes</i>   | 2.5                         | yes        |
| <i>Tenuiphantes tenuis</i>     | 3.2                         | yes        |
| <i>Tibellus oblongus</i>       | 10.0                        | yes        |
| <i>Tiso vagans</i>             | 2.2                         | yes        |
| <i>Trachyzelotes pedestris</i> | 8.0                         | no         |
| <i>Trichoncus saxicola</i>     | 2.1                         | no         |
| <i>Trochosa ruricola</i>       | 14.0                        | no         |
| <i>Trochosa terricola</i>      | 14.0                        | yes        |
| <i>Walckenaeria acuminata</i>  | 4.0                         | yes        |
| <i>Walckenaeria antica</i>     | 2.6                         | yes        |

Table S1 - Species list of spiders and related traits based on literature (4/4)

| Species                          | Body length of females (mm)<br>[1–4] | Ballooning<br>[5,6] |
|----------------------------------|--------------------------------------|---------------------|
| <i>Walckenaeria atrotibialis</i> | 2.8                                  | no                  |
| <i>Walckenaeria cucullata</i>    | 2.7                                  | no                  |
| <i>Walckenaeria incisa</i>       | 3.2                                  | no                  |
| <i>Xysticus acerbus</i>          | 8.0                                  | no                  |
| <i>Xysticus cristatus</i>        | 8.0                                  | yes                 |
| <i>Xysticus erraticus</i>        | 8.0                                  | no                  |
| <i>Xysticus kochi</i>            | 8.0                                  | yes                 |
| <i>Zelotes apricorum</i>         | 9.0                                  | no                  |
| <i>Zelotes electus</i>           | 5.5                                  | no                  |
| <i>Zelotes latreillei</i>        | 8.0                                  | yes                 |
| <i>Zelotes petrensis</i>         | 7.0                                  | no                  |
| <i>Zelotes tenuis</i>            | 9.6                                  | no                  |
| <i>Zodarion italicum</i>         | 3.0                                  | no                  |
| <i>Zodarion rubidum</i>          | 4.4                                  | no                  |
| <i>Zora spinimana</i>            | 6.5                                  | yes                 |

## References

1. Roberts, M.J. *The Spiders of Great Britain and Ireland, Volume 1: Atypidae to Theridiosomatidae*; Harley Books, Colchester, UK, 1985; ISBN 978-0-946589-18-0.
2. Roberts, M.J. *The Spiders of Great Britain and Ireland, Volume 2: Linyphiidae and Check List*; Harley Books, Colchester, UK, 1987; ISBN 978-90-04-61178-8.
3. Macías-Hernández, N.; Ramos, C.; Domènech, M.; Febles, S.; Santos, I.; Arnedo, M.; Borges, P.; Emerson, B.; Cardoso, P. A Database of Functional Traits for Spiders from Native Forests of the Iberian Peninsula and Macaronesia. *Biodivers. Data J.* **2020**, *8*, e49159, doi:10.3897/BDJ.8.e49159.
4. Nentwig, W.; Blick, T.; Bosmans, R.; Gloor, D.; Hänggi, A.; Christian, K. Spiders of Europe - Version 09.2023. Available online: <http://www.araneae.unibe.ch/> (accessed on 1 September 2023).
5. Blandenier, G.; Fürst, P. Ballooning Spiders Caught by a Suction Trap in an Agricultural Landscape in Switzerland.; British Arachnological Society Buckinghamshire, 1998; Vol. 1997, pp. 178–186.
6. Bell, J.; Bohan, D.; Shaw, E.; Weyman, G. Ballooning Dispersal Using Silk: World Fauna, Phylogenies, Genetics and Models. *Bull. Entomol. Res.* **2005**, *95*, 69–114.
